# Supplementary material
Source: Research Square preprint supplement (doi:10.21203/rs.3.rs-9075901/v1)
Supplement: Supplementary file 1 [file 548c3bea2d0f4b8cd5b46e9b.docx]

**RESEARCH INSTRUMENT (ENGLISH)**

**INTERVIEW SCHEDULE**

**Tribhuvan University, Institute of Medicine**

**Maharajung Nursing Campus**

Title: Factors Associated with Enrolment in National Health Insurance Program Among Community People in an Urban Municipality.

**Direction:** The interview schedule contains four Parts and the researcher asked the following questions to the respondents and circled ( o ) in the code of the responses given by the respondents as well as in the space for open answers.

| **Identification Data** | | | |
| --- | --- | --- | --- |
|  | Date of Interview | 2080/ / | |
|  | Participants ID |  | |
| **Part-I: Socio-demographic Information** | | | |
| 1. **General Information** | | | |
| Q.N. | Questions | Response Category | Remarks |
|  | Are you head of the family? | No  Yes | 0  1 |
|  | Age of the respondent (completed years) | ____years |  |
|  | Sex of family head | Male  Female | 1  2 |
|  | What is your educational attainment? | No education | 1 |
| Basic education (1-8) | 2 |
| Secondary level (9-12) | 3 |
| More than secondary level (13 and above) | 4 |
|  | What is ethnicity of the family? | Dalit | 1 |
| Janjati | 2 |
| Madhesi | 3 |
| Muslim | 4 |
| Brahmin/Chhetri | 5 |
| Others | 6 |
|  | What is the major occupation of family head? | Agriculture | 1 |
| Business | 2 |
| Government/private service | 3 |
| House maker | 4 |
| Labour | 5 |
| Other (specify) | 6 |

| B. **Family size and composition** | | | |
| --- | --- | --- | --- |
|  | Type of family | Nuclear | 1 |
| Joint | 2 |
|  | Total number of members in your family |  |  |
|  | Number of children under 5 years in your family |  |  |
|  | Number of elderly above 60 years in your family |  |  |
|  | Number of members in your family who have completed their secondary level |  |  |
| **C. Family economic status (Modified Kuppuswamy Scale, 2019)** | | | |
|  | Education | Score | Remarks |
| 12.1 | Professional or Honors | 7 |  |
| 12.2 | Graduate or Post graduate | 6 |  |
| 12.3 | Intermediate of Post high school diploma | 5 |  |
| 12.4 | High school certificate | 4 |  |
| 12.5 | Middle school certificate | 3 |  |
| 12.6 | Primary School or Literate | 2 |  |
| 12.7 | Illiterate | 1 |  |
| 13 | Occupation |  |  |
| 13.1 | Profession | 7 |  |
| 13.2 | Semi-profession | 6 |  |
| 13.3 | Clerical, shop owner, Farmer | 5 |  |
| 13.4 | Skilled worker | 4 |  |
| 13.5 | Semi-skilled worker | 3 |  |
| 13.6 | Unskilled worker | 2 |  |
| 13.7 | Unemployment | 1 |  |
| 14. | Monthly family income (in NPR) |  |  |
| 14.1 | ≥ 97451 | 12 |  |
| 14.2 | 48751-97450 | 10 |  |
| 14.3 | 36551-48750 | 6 |  |
| 14.4 | 24351-36550 | 4 |  |
| 14.5 | 14551-24350 | 3 |  |
| 14.6 | 4851- 14550 | 2 |  |
| 14.7 | ≤ 4850 | 1 |  |

| **Part 2 Family Morbidity characteristics** | | | |
| --- | --- | --- | --- |
| Q.N. | Questions | Response categories | Codes |
| 15. | Did any of your family members suffer from communicable disease or other illnesses which needs to seek medical treatment in the past 1 year? | No : go to question number 17 | 0 |
| Yes | 1 |
| 16. | If yes how many times did your family members get ill in the past 1 year? | ---------times |  |
| 17. | If yes, specify the diseases? | ---------- |  |
| 18. | a) Where do you used to go for the treatment when your family members get ill before enrolment? (for enrolled family)  b) Where do you go for the treatment when your family members get ill? (for non-enrolled family)  (Multiple Response) | Government hospital | 1 |
| Private hospital/clinic | 2 |
| Ayurvedic or alternative medicine | 3 |
| Tradition healers | 4 |
| Others (specify) | 5 |
| Perceived health status | | | |
| 19. | In general, what would you like to say about the health status of your family members? | Very poor | 1 |
| Poor | 2 |
| Fair | 3 |
| Good | 4 |
| Very good | 5 |

| **Part III Knowledge about government health insurance program** | | | | | | | | | |
| --- | --- | --- | --- | --- | --- | --- | --- | --- | --- |
| Q. N. | | Questions | | | Response categories | | | Codes | |
| 20. | | Have you heard about National Health Insurance Program? (Skip if the family is enrolled) | | | No  Yes | | | 0  1 | |
| 21. | | How much is the annual premium for the family? | | | NRS. 3500 | | | 1 | |
| Other than NRS. 3500 | | | 0 | |
| 22. | | How many members of the family are benefited by paying Rs. 3500? | | | 5 members  Other than 5 | | | 1  0 | |
| 23. | | How much is the addition premium for each additional member beyond five members? | | | NRS. 700 | | | 1 | |
| Other than NRS. 700 | | | 0 | |
| 24. | | How much is the annual benefit ceiling for family upto five members? | | | NRS. 100000 | | | 1 | |
| Other than NRS. 100000 | | | 0 | |
| 25. | | How much is the annual benefit for each member beyond five members? | | | NRS. 20000 | | | 1 | |
| Other than NRS. 20000 | | | 0 | |
| 26. | | What is the maximum annual benefit per family? | | | NRS. 200000 | | | 1 | |
| Other than NRS. 200000 | | | 0 | |
| 27. | | What is the period of renewal of the membership? | | | Once annually | | | 1 | |
| Other than once annually | | | 0 | |
| 28. | | From which sources did you get information regarding the national health insurance program?  (Multiple Response) | | | Enrolment assistant  Health worker  Neighbors/relatives  Mass Media  Others (specify) | | | 1  2  3  4  5 | |
| 29. | | Why do you enroll/ not enroll in the national health insurance program? | | |  | | |  | |
| **Part IV Perception about National health insurance program and health service** | | | | | | | | | |
| 1. **Perception about national health insurance program** | | | | | | | | | |
| Q. N. | Questions | | Response categories | | | | | | |
| 30. | How much do you agree or disagree with the following statements? | | Strongly agree | Agree | | Neutral | Disagree | | Strongly disagree |
| 30.1 | National health insurance program saves money by paying for the health care costs | | 5 | 4 | | 3 | 2 | | 1 |

| 30.2 | Enrolling in the program is beneficial for my family | 5 | 4 | 3 | 2 | 1 |
| --- | --- | --- | --- | --- | --- | --- |
| 30.3 | We don’t need to borrow money during illness and emergencies after enrolling in government health insurance program | 5 | 4 | 3 | 2 | 1 |
| 30.4 | The premium amount is too high. | 5 | 4 | 3 | 2 | 1 |
| 30.5 | The benefit ceiling is too low. | 5 | 4 | 3 | 2 | 1 |
| 30.6 | The benefit package is limited. | 5 | 4 | 3 | 2 | 1 |
| **B. Perception about health services** | | | | | | |
| 31. | How much do you agree or disagree with the following statements? | Strongly agree | Agree | Neutral | Disagree | Strongly disagree |
| 31.1 | There are sufficient number of health care providers | 5 | 4 | 3 | 2 | 1 |

| 31.2 | The process of getting service is lengthy due to documentation. |  | 4 | 3 | 2 | 1 |
| --- | --- | --- | --- | --- | --- | --- |
| 31.3 | The diagnostic test are good | 5 | 4 | 3 | 2 | 1 |
| 31.4 | The medicines are adequate | 5 | 4 | 3 | 2 | 1 |
| 31.5 | The medicines are of good quality | 5 | 4 | 3 | 2 | 1 |
| 31.6 | Insured members get better care and services than the uninsured | 5 | 4 | 3 | 2 | 1 |
| 31.7 | Get better care and treatment without long waiting hours | 5 | 4 | 3 | 2 | 1 |

**LIST OF EXPERTISE CONSULTED FOR VALIDATION OF INSTRUMENT**

| **S.N.** | **Name of Experts** | **Designation** | **Working Organization** |
| --- | --- | --- | --- |
|  | Ms. Tulasi Adhikari Mishra | Associate Professor (Faculty of Health Service Management) | Tribhuwan University, Institute of Medicine, Magharajgunj Nursing Campus |
|  | Ms. Mamata Manandhar | Teaching Assistant (Faculty of Community Health Nursing) | Tribhuwan University, Institute of Medicine, Magharajgunj Nursing Campus |
|  | Ms. Rashmi Gachhadhar | Teaching Assistant (Faculty of Community Health Nursing) | Tribhuwan University, Institute of Medicine, Magharajgunj Nursing Campus |
|  | Mr. Shankar Singh Dhami | Provincial SRHR Officer | World Health Organization Nepal |
|  | Ms. Sanju Shah | Health Insurance Assistant | Tikapur Hospital, Kailali |
